# Supplementary material for: Comprehensive exon array data processing method for quantitative analysis of alternative spliced variants
Source: PubMed Central journal article supplement — Nucleic Acids Res. 2011 Jul 9;39(18):e123. doi: 10.1093/nar/gkr513 (PMC3185423; doi:10.1093/nar/gkr513), 2011-07-09
Supplement: supp_gkr513_nar-00773-met-n-2011-File007.pdf [file supp_gkr513_nar-00773-met-n-2011-File007.pdf]

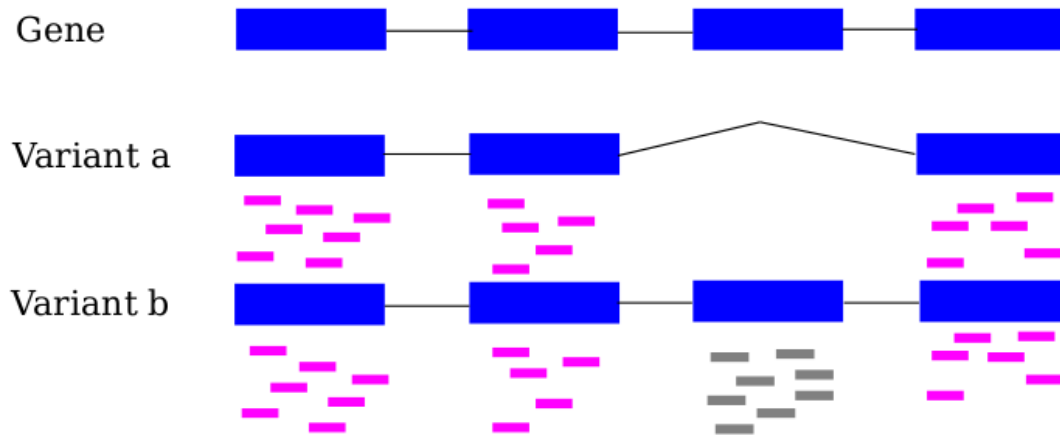

**Figure 1.** Probe selection in gene expression estimation. Pink probes that map to variant a and b are used for gene expression summarization. Grey probes are discarded as they only target fragments from variant b.

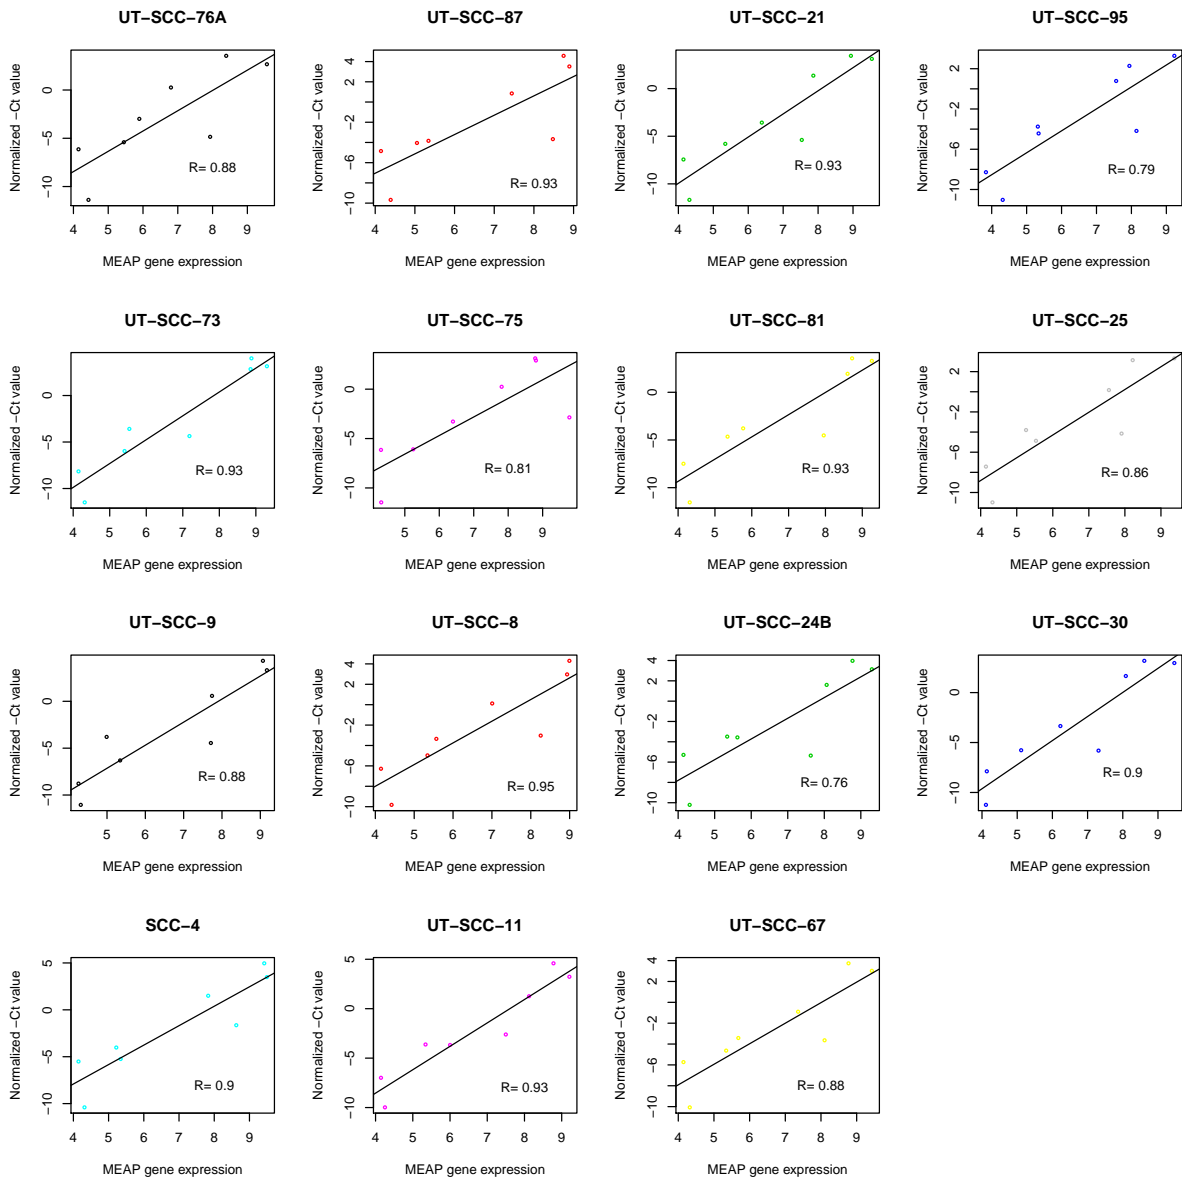

**Figure 2.** Gene expression correlation. qPCR -Ct values are correlated with expression values. Spearman correlation between MEAP gene expression and qPCR normalized -Ct values for eight reference genes from 15 cell lines shows our gene expression summarization method is accurate and reliable.

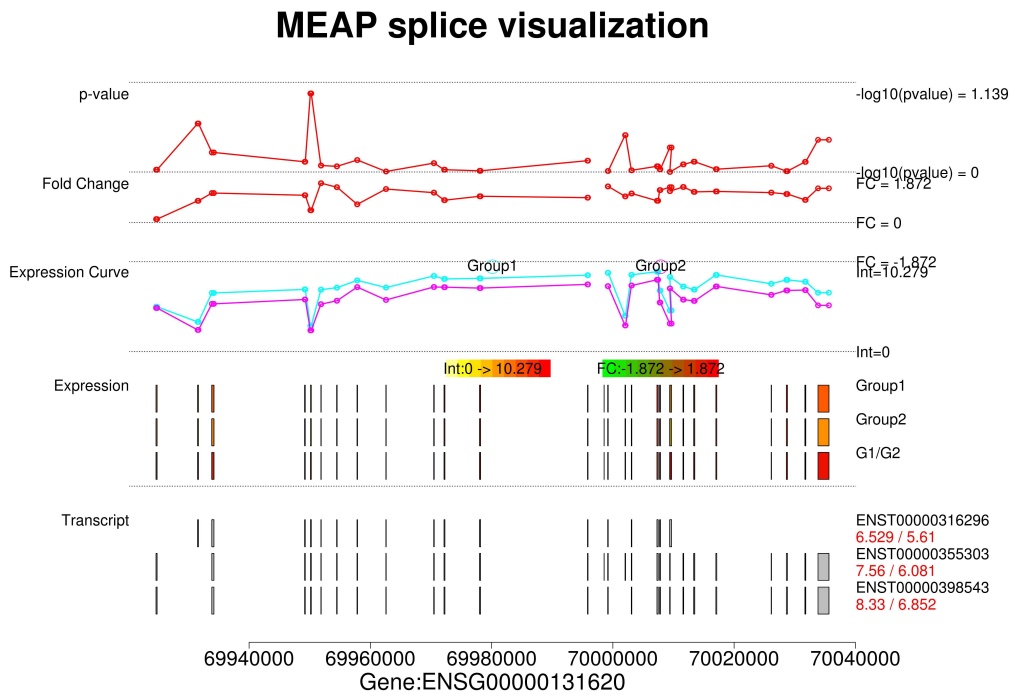

Figure 3. MEAP splice visualization plot for gene *ANO1*.

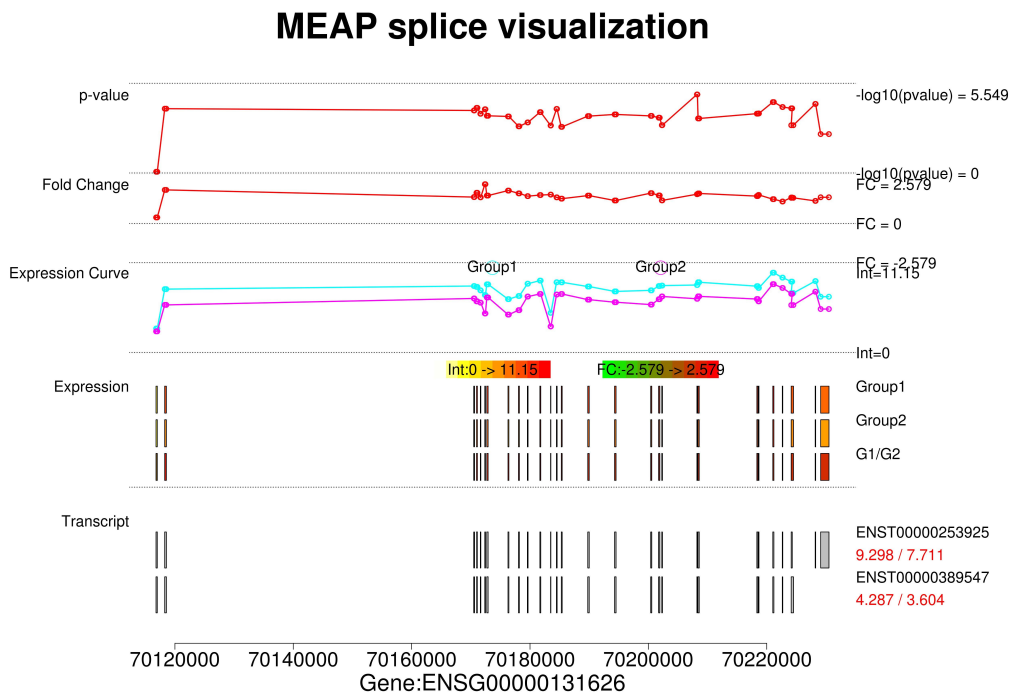

Figure 4. MEAP splice visualization plot for gene *PPF1A1*.
